# Supplementary material
Source: PubMed Central journal article supplement (PMC9026661)
Supplement: NIHMS1791537-supplement-2.pdf [file NIHMS1791537-supplement-2.pdf]

## Supplementary Figures and Figure legends

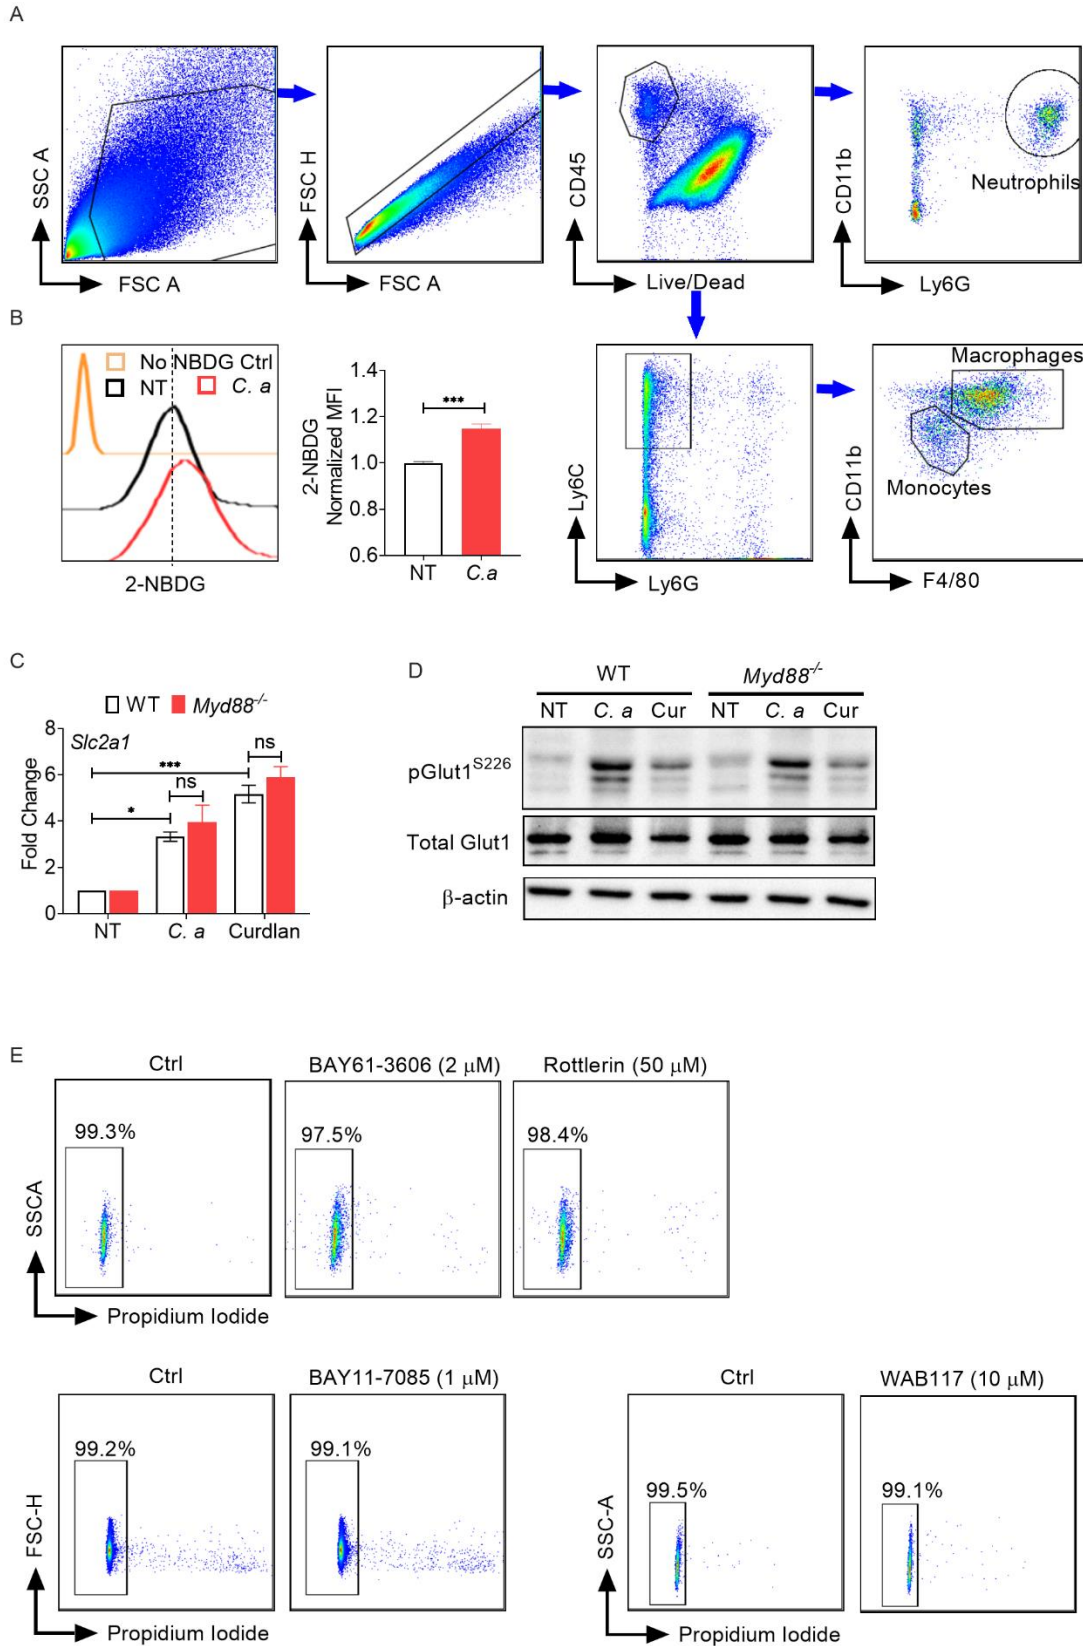

**Fig S1: Increased glucose uptake by fungal-stimulated neutrophils.** (A) Representative flow cytometry analysis gating strategy for identification of kidney infiltrating immune cells: neutrophils (liveCD45<sup>+</sup>CD11b<sup>+</sup>Ly6G<sup>+</sup>), macrophages (liveCD45<sup>+</sup>Ly6C<sup>+</sup>Ly6G<sup>-</sup>CD11b<sup>hi</sup>F4/80<sup>hi</sup>), monocytes (liveCD45<sup>+</sup>Ly6C<sup>+</sup>Ly6G<sup>-</sup>CD11b<sup>low</sup>F4/80<sup>low</sup>). (B) BM neutrophils from WT mice were stimulated with *C. a* (MOI=1) for 1.5 h. Glucose uptake by neutrophils was detected by flow cytometry analysis using a fluorescent glucose analog 2-NBDG. (C) Neutrophils from WT or *Myd88*<sup>-/-</sup> mice were stimulated with *C. a* (MOI=0.2) or curdlan (10 µg/ml). Gene expression of *Slc2a1* was assessed by qPCR. (D) Neutrophils from WT or *Myd88*<sup>-/-</sup> mice were stimulated with *C. a* (MOI=1) or curdlan (100 µg/ml). Phosphorylation of Glut1 was measured by western blot at 30 min post-stimulation. (E) Neutrophils from WT mice were either treated with indicated inhibitors for 3 h or left untreated (Ctrl). Cells were stained by Propidium Iodide and assessed for viability by flow cytometry analysis. Data pooled from at least 3 independent experiments (A-C) and representative images from 3 experiments (D) are shown. Statistical analysis by Student's T test (B) and Two-way ANOVA (C). Data are represented as mean ± SEM (B, C). (Related to Figure 1 and 2)

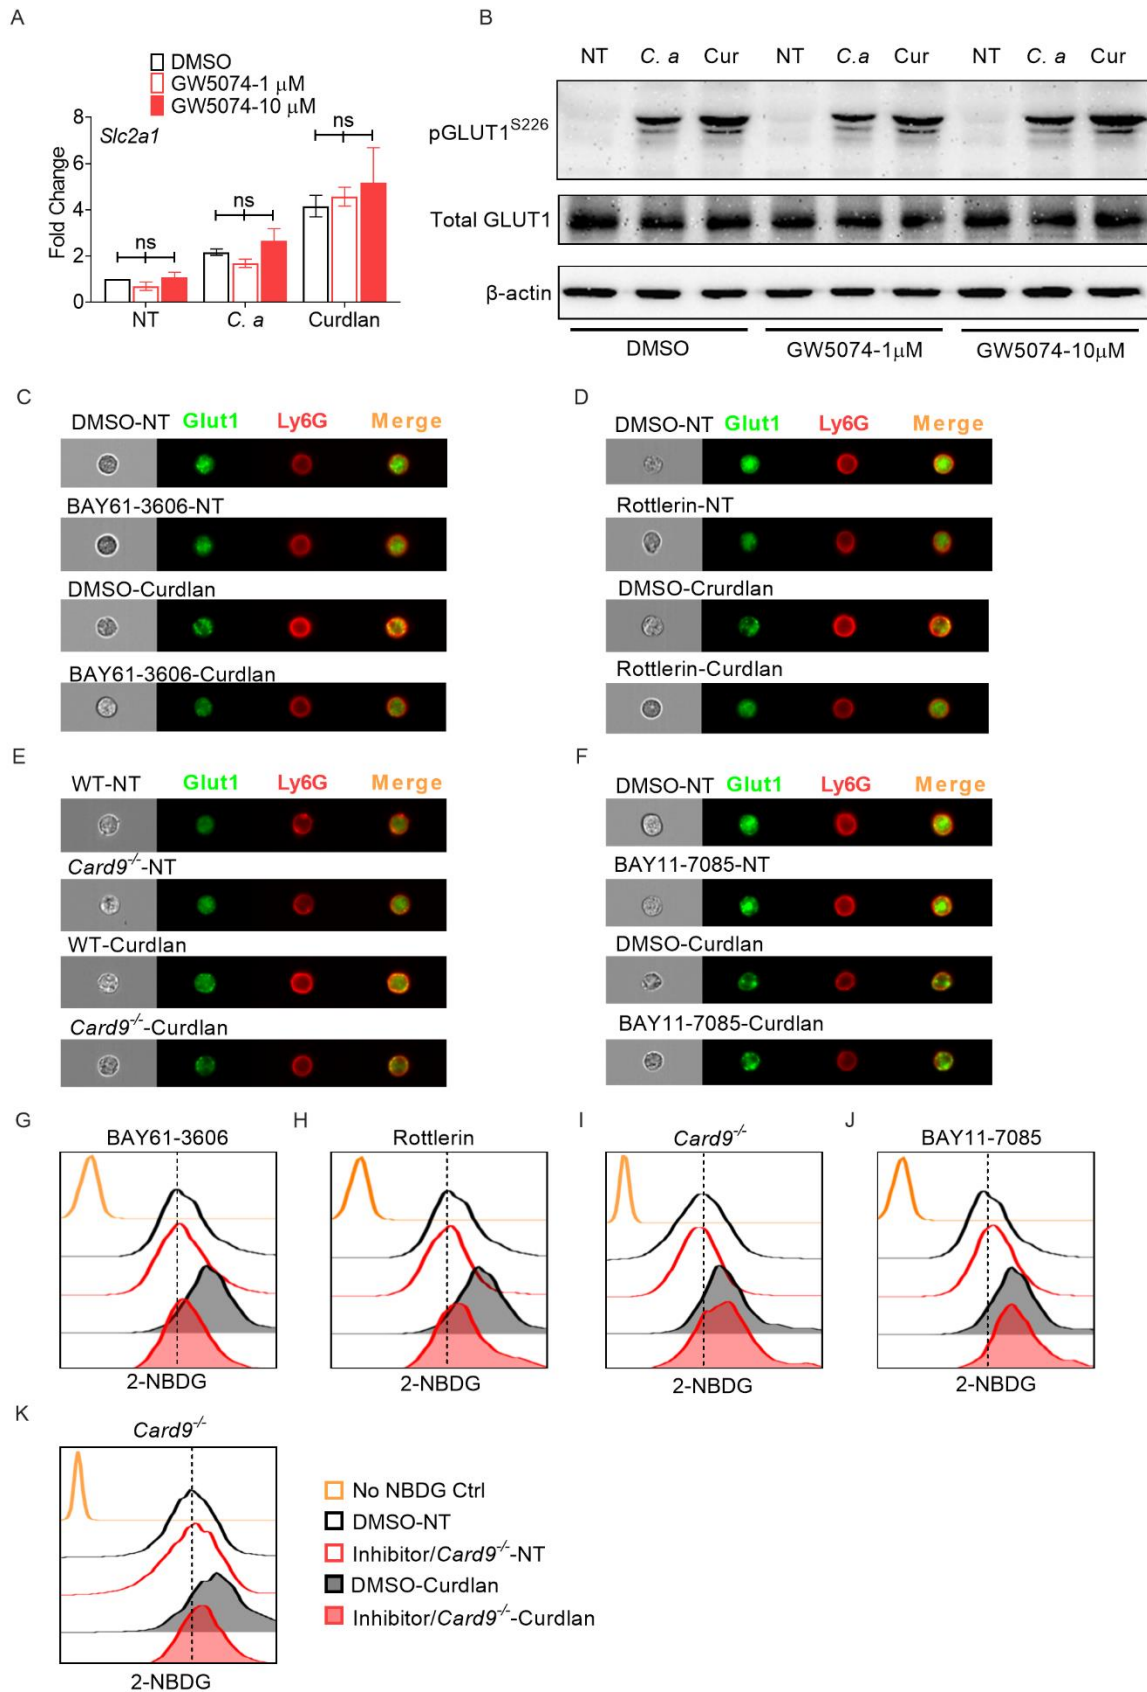

**Fig S2: *Glut1* function is regulated by the *dectin-1/PKCδ* pathway in neutrophils.** (A) BM neutrophils from WT mice were stimulated with *C. albicans* (*C. a*) (MOI=0.2) or curdlan (Cur) (10 µg/ml) for 3 h with/without Raf-1 inhibitor GW5074. Gene expression of *Slc2a1* was measured by qPCR, normalized to *Gapdh*. (B) Neutrophils from WT mice were stimulated with *C. a* (MOI=1) or curdlan (100 µg/ml) for 30 min in the presence or absence of Raf-1 inhibitor GW5074. Phosphorylation of Glut1 was assessed by western blot. Neutrophils from WT or *Card9*<sup>-/-</sup> mice were stimulated with curdlan (100 µg/ml) for 1.5 h in the presence or absence of indicated inhibitors. (C, D, E, F) Localization of Glut1 in neutrophils was visualized by ImageStream. (G, H, I, J) Glucose uptake of neutrophils (2-NBDG<sup>+</sup> cells) was detected by flow cytometry analysis. (K) Neutrophils from WT or *Card9*<sup>-/-</sup> mice were stimulated with curdlan (10 µg/ml) for 6 h, and glucose uptake of neutrophils (2-NBDG<sup>+</sup> cells) was detected by flow cytometry analysis. Data pooled from at least 3 independent experiments and representative images are shown. Statistical analysis by Two-way ANOVA (A). Data are represented as mean ± SEM (A). (Related to Figure 3 and 4)

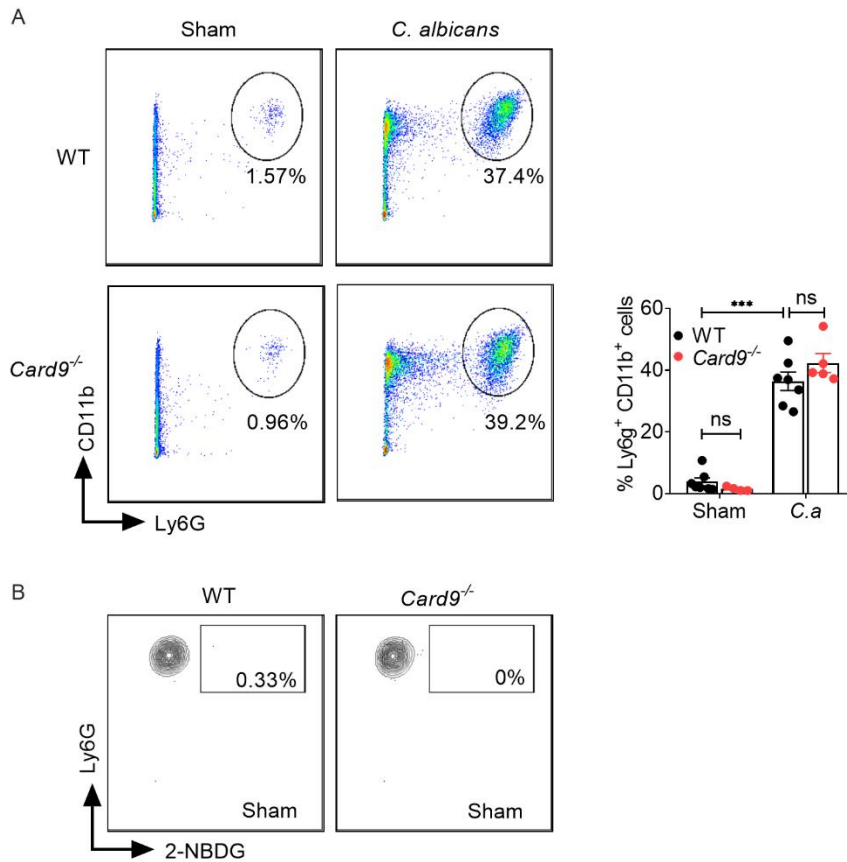

**Fig S3: *Card9*<sup>-/-</sup> mice showed compromised glucose uptake after *C. albicans* infection.** WT or *Card9*<sup>-/-</sup> mice were infected with 10<sup>5</sup> CFU of *C. albicans* (*C. a*) for 24 h (n=4-7). **(A)** The number of kidney-infiltrating neutrophils and **(B)** glucose uptake by neutrophils (2-NBDG<sup>+</sup> cells) were measured by flow cytometry analysis. Data pooled from at least 2 independent experiments and representative images are shown. Statistical analysis by Two-way ANOVA (A). Data are represented as mean ± SEM (A). (Related to Figure 4)

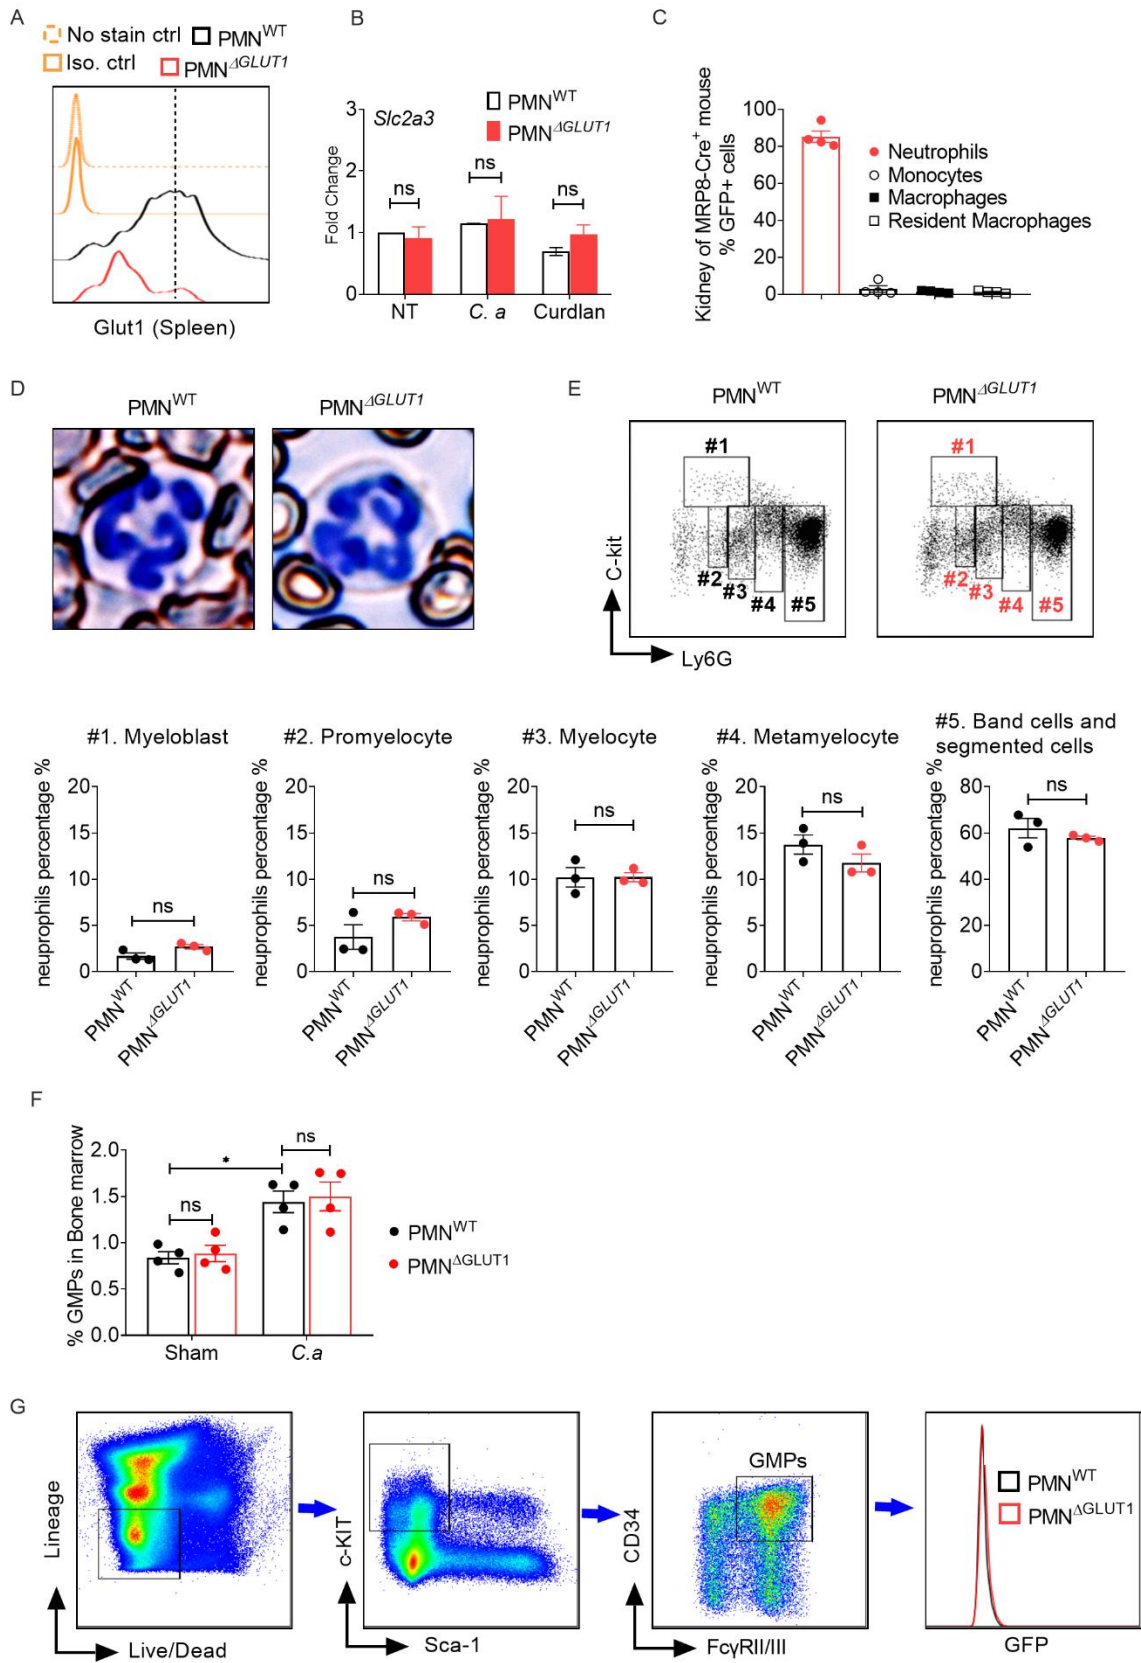

**Fig S4: Neutrophil-specific Glut1 conditional knockout mice exhibited normal granulopoiesis and neutrophil morphology.** (A) Glut1 expression in the splenic neutrophils was measured by flow cytometry analysis. (B) BM neutrophils from PMN<sup>WT</sup> or PMN <sup>$\Delta$ GLUT1</sup> mice were stimulated with *C. albicans* (*C. a*) (MOI=0.2) or curdlan (Cur) (10  $\mu$ g/ml) for 3 h. Gene expression of *Slc2a3* was measured by qPCR, normalized to *Gapdh*. (C) Neutrophils (liveCD45<sup>+</sup>CD11b<sup>+</sup>Ly6G<sup>+</sup>), kidney-resident macrophages (liveCD45<sup>+</sup>Ly6C<sup>+</sup>Ly6G<sup>-</sup>CD11b<sup>hi</sup>F4/80<sup>hi</sup>CX3Cr1<sup>+</sup>) and monocyte/macrophages (liveCD45<sup>+</sup>Ly6C<sup>+</sup>Ly6G<sup>-</sup>CD11b<sup>low</sup>F4/80<sup>low</sup>/liveCD45<sup>+</sup>Ly6C<sup>+</sup>Ly6G<sup>-</sup>CD11b<sup>hi</sup>F4/80<sup>hi</sup>) were assessed for MRP8Cre activity on the basis of GFP expression by flow cytometry analysis at the baseline. (D) Peripheral blood smears of PMN<sup>WT</sup> and PMN <sup>$\Delta$ GLUT1</sup> mice were stained with Giemsa stain and microscopically evaluated for the morphology of neutrophils. (E) Granulopoiesis in the BM of PMN<sup>WT</sup> and PMN <sup>$\Delta$ GLUT1</sup> mice was measured by flow cytometry analysis. BM of PMN<sup>WT</sup> and PMN <sup>$\Delta$ GLUT1</sup> mice were evaluated for (F) frequency of GMPs before and after infection and (G) MRP8Cre activity at the baseline by flow cytometry analysis. Representative flow cytometry analysis plots from 1 of 3-4 mice were shown (E-G). Data pooled from at least 2 independent experiments (A-G) and representative images are shown. Statistical analysis by Two-way ANOVA (B and F) or Student's T test (E). Data are represented as mean  $\pm$  SEM (B, C, E, F). (Related to Figure 5)

A

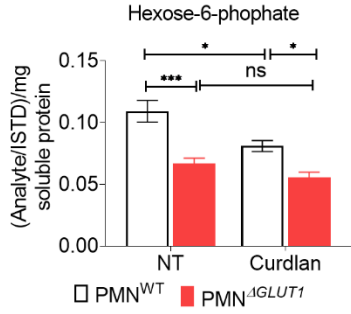

B

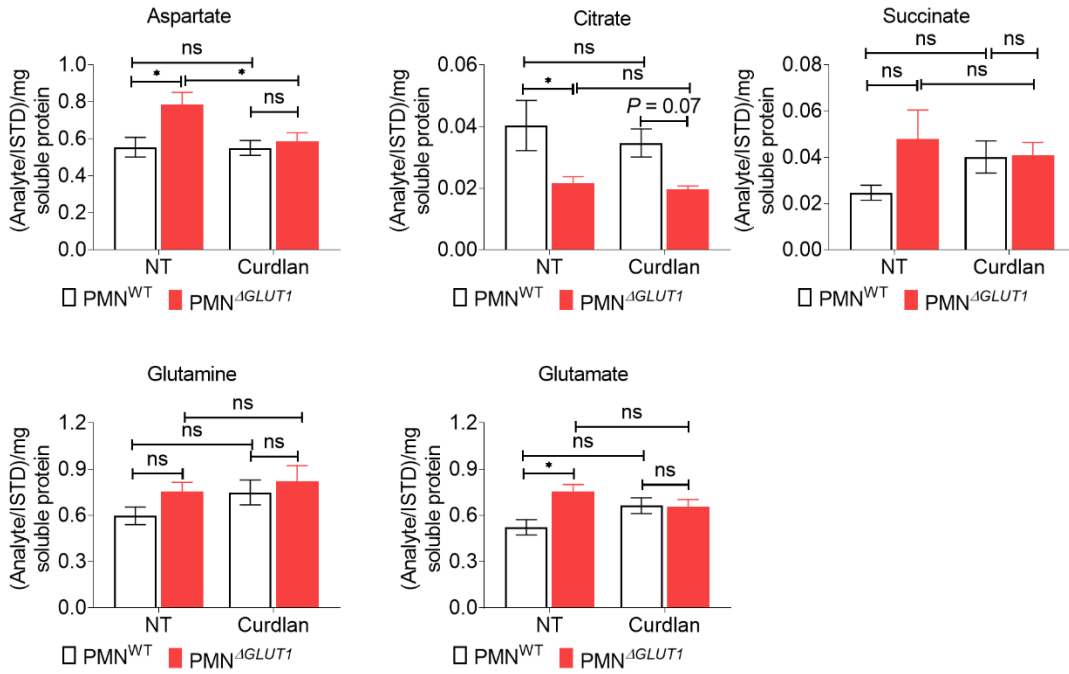

C

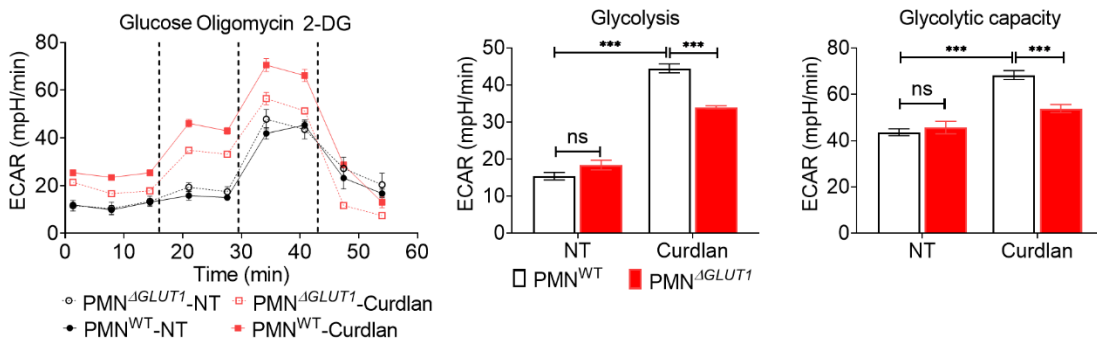



**Fig S5: *Glut1* deficiency in neutrophils suppresses glycolysis after curdlan stimulation.** BM neutrophils from PMN<sup>WT</sup> or PMN <sup>$\Delta$ GLUT1</sup> mice (n=8) were stimulated with curdlan (Cur) (10  $\mu$ g/ml) for 3 h. Cell pellets were subjected to a metabolomics study using untargeted LC-HRMS. **(A)** Hexose-6-phosphate and **(B)** metabolites of TCA cycle expression between before and after curdlan stimulation were detected using untargeted high-resolution LC-HRMS. **(C)** BM neutrophils from PMN<sup>WT</sup> and PMN <sup>$\Delta$ GLUT1</sup> mice were stimulated with curdlan (10  $\mu$ g/ml) for 3 h. Seahorse assay was performed to detect the ECAR (Basal extracellular acidification rate) before and after curdlan stimulation. Data pooled from 3-4 independent experiments. Statistical analysis by Two-way ANOVA (A-C). Data are represented as mean  $\pm$  SEM (A-C). (Related to Figure 5)

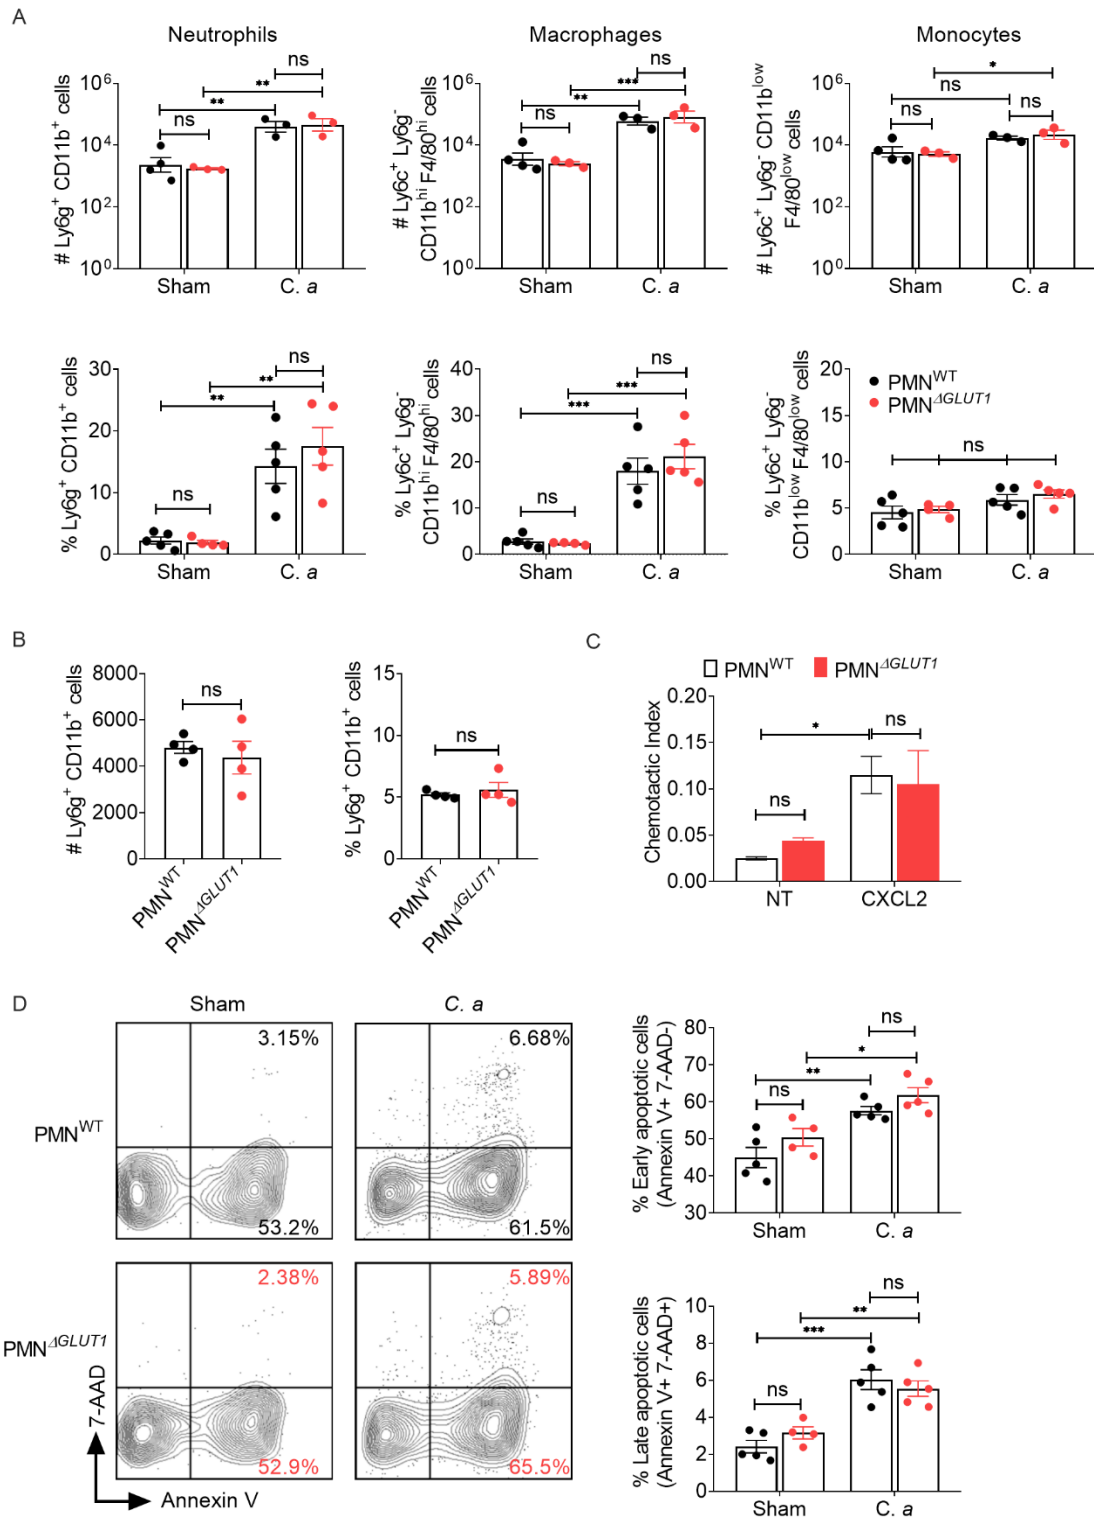

**Fig S6: Deficiency of *Glut1* in neutrophils has no impact on migration and apoptosis.** PMN<sup>WT</sup> and PMN<sup>Δ*GLUT1*</sup> mice were infected with 10<sup>5</sup> CFU of *C. albicans* (*C. a*) for 24 h. **(A)** Number of kidney-infiltrating neutrophils, macrophages and monocytes were detected by flow cytometry analysis. **(B)** PMN<sup>WT</sup> and PMN<sup>Δ*GLUT1*</sup> mice were infected with 5 x 10<sup>6</sup> CFU of *C. albicans* (*C. a*) for 2 h. Kidney infiltrating neutrophils were detected by flow cytometry analysis. **(C)** BM neutrophils from PMN<sup>WT</sup> and PMN<sup>Δ*GLUT1*</sup> mice were subjected to transwell migration assay in the presence or absence of recombinant murine CXCL2 (100 ng/ml) for 1.5 h. The numbers of neutrophils in the lower and upper chambers were quantified by flow cytometry analysis and expressed as Chemotactic Index. **(D)** PMN<sup>WT</sup> and PMN<sup>Δ*GLUT1*</sup> mice were infected with 10<sup>5</sup> CFU of *C. a* for 24 h. Apoptosis of kidney infiltrating neutrophils was detected by flow cytometry analysis. Data pooled from at least 2 independent experiments and representative images are shown in D. Statistical analysis by Two-way ANOVA (A, C, D) or Student's T test (B). Data are represented as mean ± SEM (A-D). (Related to Figure 6)

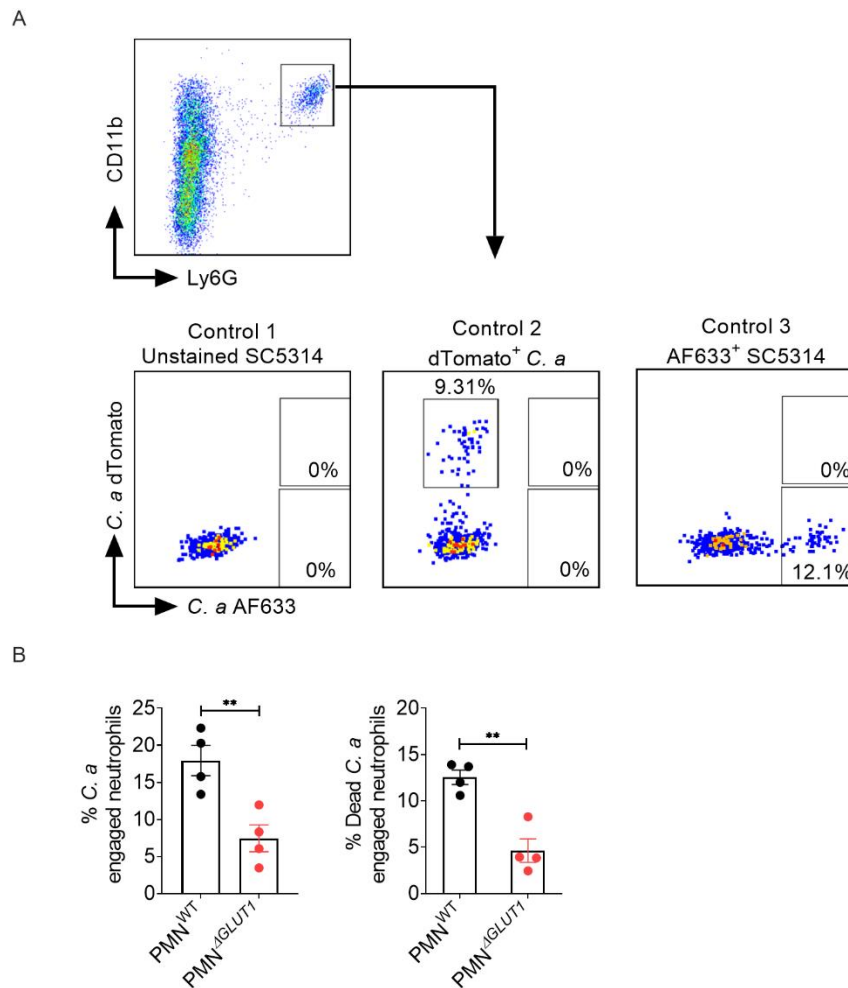

**Fig S7: Deficiency of *Glut1* impaired phagocytosis and intracellular killing by neutrophils in *C. albicans* infection.** (A) WT mice were infected with  $5 \times 10^6$  CFU of *C. albicans* (*C. a*) (Control 1) or dTomato<sup>+</sup> *C. a* (Control 2) or AF633<sup>+</sup> *C. a* (Control 3). Mice were sacrificed at 2 h p.i. and phagocytosis and intracellular killing by kidney infiltrating neutrophils were measured by flow cytometry analysis. (B) PMN<sup>WT</sup> and PMN<sup>ΔGLUT1</sup> mice were infected with  $5 \times 10^6$  CFU of Streptavidin-AF633<sup>+</sup>dTomato<sup>+</sup> *C. a*. Mice were sacrificed at 2 h p.i. and phagocytosis and intracellular killing by kidney-infiltrating neutrophils were measured by flow cytometry analysis. Percentage of *C. a* engulfed neutrophils and percentage of dead *C. a* engulfed neutrophils are

shown. Data pooled from at least 2 independent experiments and representative images are shown in A. Statistical analysis by Student's T test (B). Data are represented as mean  $\pm$  SEM (B). (Related to Figure 6)

**Supplementary Table 1: Demographic information of healthy volunteers (n=10)** (Related to Figure 7 and STAR Methods)

| <b>Total number of human subjects</b> | <b>Race</b>                                    | <b>Gender</b>       | <b>Age</b> |
|---------------------------------------|------------------------------------------------|---------------------|------------|
| 10                                    | 7 Asians<br>2 African Americans<br>1 Caucasian | 9 Males<br>1 Female | 32.1 ± 7.1 |

**Supplementary Table 2: Oligonucleotides used in this study.** (Related to STAR Methods)

| <b>Oligonucleotides</b>                 | <b>Source</b> | <b>Identifier</b> |
|-----------------------------------------|---------------|-------------------|
| Mm_Slc2a1_1_SG QuantiTect Primer Assay  | QIAGEN        | Cat# QT01044953   |
| Mm_Slc2a2_1_SG QuantiTect Primer Assay  | QIAGEN        | Cat# QT00103537   |
| Mm_Slc2a3_1_SG QuantiTect Primer Assay  | QIAGEN        | Cat# QT00159691   |
| Mm_Slc2a4_1_SG QuantiTect Primer Assay  | QIAGEN        | Cat# QT01044953   |
| Mm_Slc2a7_1_SG QuantiTect Primer Assay  | QIAGEN        | Cat# QT00323057   |
| Mm_Slc2a8_1_SG QuantiTect Primer Assay  | QIAGEN        | Cat# QT00119602   |
| Mm_Slc2a9_1_SG QuantiTect Primer Assay  | QIAGEN        | Cat# QT00106785   |
| Mm_Slc2a10_1_SG QuantiTect Primer Assay | QIAGEN        | Cat# QT00252553   |
| Mm_Slc2a12_1_SG QuantiTect Primer Assay | QIAGEN        | Cat# QT00173719   |
| Mm_Gapdh_3_SG QuantiTect Primer Assay   | QIAGEN        | Cat# QT01658692   |
| Hs_SLC2A1_1_SG QuantiTect Primer Assay  | QIAGEN        | Cat# QT00068957   |
| Hs_GAPDH_1_SG QuantiTect Primer Assay   | QIAGEN        | Cat# QT00079247   |
